# Supplementary material
Source: PubMed Central journal article supplement (PMC7607848)
Supplement: NIHMS1641170-supplement-SI.pdf [file NIHMS1641170-supplement-SI.pdf]

## SUPPORTING INFORMATION

### **A peripherally restricted purine antagonist of type 1 cannabinoid (CB1) receptor blocks alcoholic steatosis in mice**

George S. Amato<sup>#</sup>, Amruta Manke<sup>#</sup>, Danni L. Harris, Robert W. Wiethe, Vineetha Vasukuttan, Rodney W. Snyder, Timothy W. Lefever, Ricardo Cortes, Yanan Zhang, Shaobin Wang, Scott P. Runyon and Rangan Maitra\*

*Discovery Science and Technology, RTI International, 3040 Cornwallis Rd., Research Triangle Park, NC 27709-2194, USA*

\* Corresponding author

# Equal contributors

#### **Contents:**

1. Homology model development and docking of **AM6538** and AMBER16 free energy (MMGBSA) scoring of residue/ligand interactions
2. Repeat dosing pharmacokinetic study of **25**
3. Brain concentration of **25** after 2 weeks of dosing in alcoholic steatosis study
4. Pharmacokinetic assessment of rimonabant
5. Molecular formula strings

## **S1. Homology model development and docking of AM6538 and AMBER16 free energy (MMGBSA) scoring of residue/ligand interactions**

The MMGBSA docked poses of **AM6538** in the 5TGZ chimeric hCB1 crystal structure are depicted in space filling (CPK) representation in **Figure S1A**. **Figure S1B** shows a closeup view of the crystal structure pose (brown) overlapped with the lowest MMGBSA pose (cyan). The lowest MMGBSA scored pose replicates the crystal structure motif within a small RMSD demonstrating the validity of our approach. A simplified LIGPLOT representation of the lowest free-energy poses of **AM6538** as well as **2** is shown in **Figure S1C**. In **Figure S1C**, a large portion of **AM6538** interacts with hydrophobic residues in the deeper regions of the orthosteric binding site. As shown in **Table S1**, AMBER16 free energy (MMGBSA) scoring of residue/ligand interactions reflect what we see visually, that a great deal of the binding free energy is due to the buried orthosteric site hydrophobic interactions for the ligand extending to the top of the piperidine group. When **2** was docked and free-energy scored, the chloro-aromatic rings overlapped the phenyl rings in **AM6538** in its lowest MMGBSA pose while the purine ring of **2** overlapped the pyrazole ring in **AM6538** allowing the piperidine rings to coincide. The rightmost panel in **Figure S1C** shows, in LIGPLOT that many of the interactions are similar between **AM6538** and **2** except the 4-position piperidine amide in **2** extends out and makes a hydrogen bonding contact with Ser 123 of helix 1.

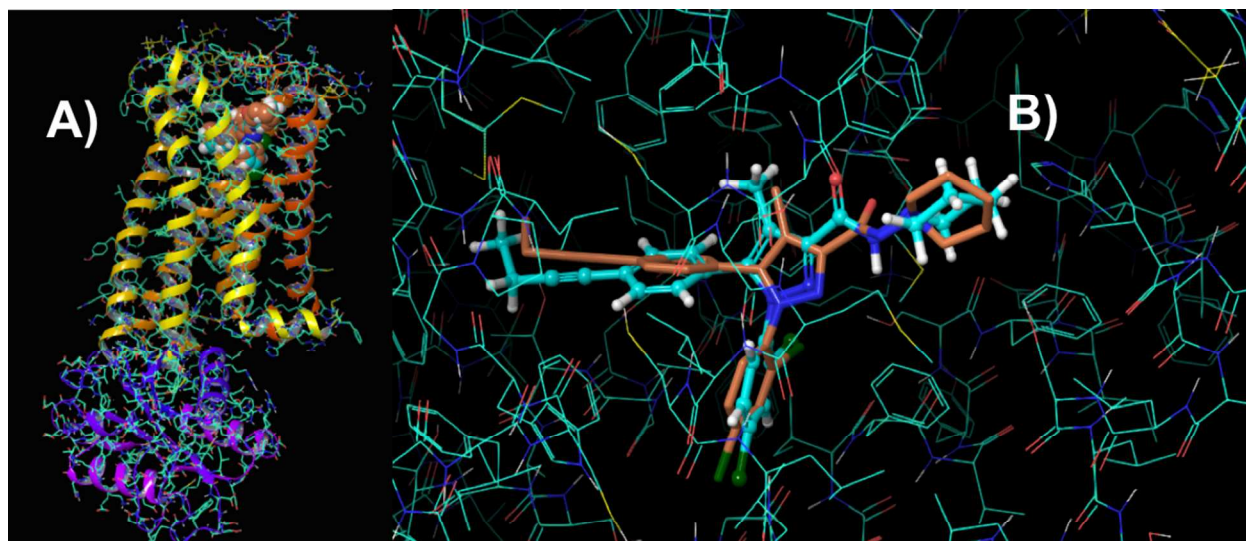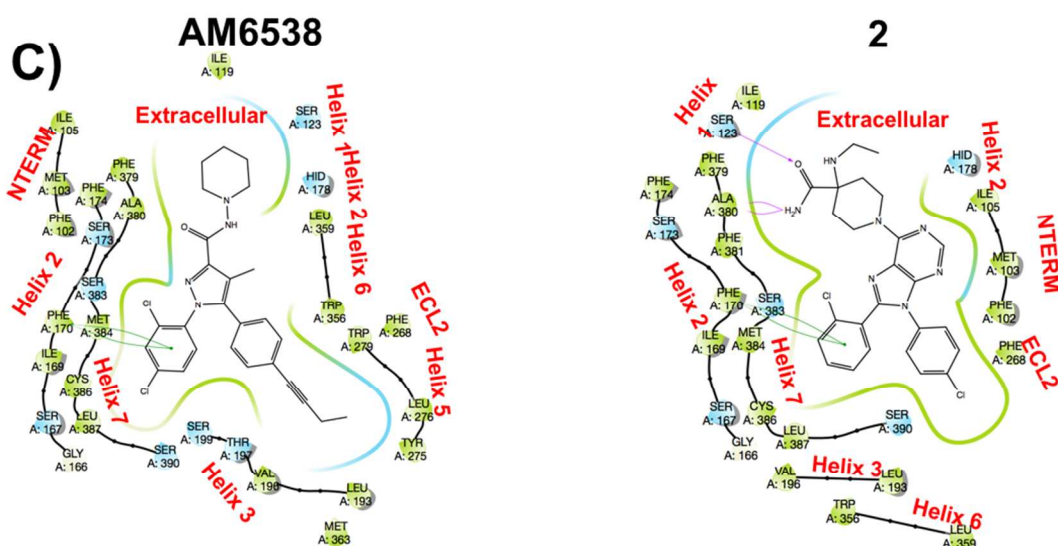

**Figure S1. Evaluation of poses for AM6538 (crystallographic ligand) and 2 in hCB1 (PDB-ID 5TGZ). (A) and (B) depict AM6538 in the lowest MMGBSA docked pose (cyan carbons) compared to AM6538 in the published crystallographic structure (brown carbons). (C) depicts the residue/helical contacts for AM6538 (crystallographic) and lowest MMGBSA pose for 2.**

TABLE S1: PAIRWISE MMGBSA INTERACTION ENERGIES OF BINDING SITE RESIDUES WITH THE CBI ANTAGONISTS

| MMGBSA INTERACTION ENERGETIC DECOMPOSITION (KCAL/MOL) |            |            |            |            |            |            |            |            |            |            |            |            |            |            |            |            |            |
|-------------------------------------------------------|------------|------------|------------|------------|------------|------------|------------|------------|------------|------------|------------|------------|------------|------------|------------|------------|------------|
| ANTAGONIST/<br>RESIDUE*                               | MET<br>103 | ILE<br>105 | GLN<br>116 | SER<br>123 | GLY<br>166 | PHE<br>170 | HIS<br>178 | VAL<br>196 | PHE<br>268 | TRP<br>356 | LEU<br>359 | PHE<br>379 | ALA<br>380 | SER<br>383 | MET<br>384 | CYS<br>386 | LEU<br>387 |
| Otenabant                                             | -6.89      | -2.58      | -0.04      | -1.12      | -0.95      | -4.59      | -1.76      | -3.74      | -2.29      | -1.66      | -1.92      | -1.94      | -2.10      | -4.48      | -3.34      | -1.27      | -1.90      |
| Rimonabant                                            | -4.50      | -2.40      | -0.03      | -0.63      | -1.40      | -4.21      | -1.13      | -4.50      | -2.00      | -2.16      | -1.91      | -1.67      | -1.85      | -4.85      | -2.23      | -1.36      | -2.70      |
| SAR1-6                                                | -6.07      | -2.23      | -0.02      | -0.60      | -1.01      | -4.19      | -0.77      | -4.03      | -1.90      | -1.80      | -1.81      | -1.48      | -1.50      | -4.85      | -2.14      | -1.56      | -2.18      |
| SAR1-7                                                | -5.37      | -2.68      | -0.25      | -0.65      | -1.10      | -4.33      | -1.83      | -4.48      | -2.49      | -2.07      | -1.90      | -2.13      | -1.90      | -5.19      | -2.01      | -1.40      | -1.84      |
| SAR1-8                                                | -5.75      | -2.48      | -0.42      | -1.16      | -1.09      | -4.95      | -2.28      | -4.13      | -2.03      | -1.69      | -1.83      | -1.81      | -1.84      | -5.15      | -1.89      | -1.80      | -2.09      |
| SAR1-9                                                | -5.71      | -2.52      | -0.20      | -1.37      | -1.12      | -4.24      | -1.77      | -4.82      | -2.07      | -2.12      | -1.86      | -1.66      | -1.02      | -4.61      | -1.93      | -1.25      | -2.18      |
| SAR1-10                                               | -5.83      | -2.36      | -0.20      | -1.26      | -1.10      | -4.90      | -2.22      | -4.19      | -2.12      | -1.67      | -1.84      | -1.82      | -1.71      | -5.47      | -1.85      | -1.77      | -2.04      |
| SAR1-11                                               | -5.07      | -3.17      | -0.18      | -0.89      | -1.19      | -4.77      | -1.21      | -4.34      | -2.46      | -1.57      | -2.02      | -2.08      | -2.53      | -5.81      | -2.21      | -1.66      | -1.81      |
| SAR1-12                                               | -7.53      | -2.50      | -0.22      | -2.50      | -0.96      | -4.59      | -1.63      | -3.65      | -2.39      | -1.56      | -1.92      | -2.03      | -1.28      | -4.29      | -2.47      | -1.50      | -1.82      |
| SAR1-13                                               | -6.77      | -2.42      | -1.13      | -0.79      | -0.97      | -4.44      | -2.21      | -3.85      | -2.37      | -1.64      | -1.91      | -1.96      | -1.16      | -4.28      | -2.26      | -1.41      | -1.92      |
| SAR1-14                                               | -6.35      | -2.22      | -0.20      | -0.99      | -0.97      | -4.56      | -1.38      | -4.24      | -2.43      | -1.89      | -1.90      | -1.93      | -1.08      | -4.14      | -1.99      | -1.32      | -2.04      |
| SAR1-15                                               | -5.50      | -2.40      | -0.44      | -1.15      | -1.04      | -4.90      | -2.38      | -4.06      | -1.90      | -1.74      | -1.82      | -1.69      | -2.02      | -5.53      | -2.05      | -1.82      | -2.10      |
| SAR1-16                                               | -5.28      | -2.37      | -0.54      | -1.12      | -1.00      | -4.53      | -2.39      | -4.43      | -2.47      | -2.14      | -1.91      | -2.01      | -1.38      | -5.98      | -1.82      | -1.38      | -1.95      |
| SAR1-17                                               | -6.56      | -2.44      | -0.85      | -1.03      | -0.94      | -4.26      | -2.40      | -3.77      | -2.38      | -1.53      | -1.92      | -1.97      | -1.14      | -4.36      | -2.38      | -1.49      | -1.85      |
| SAR1-18                                               | -5.42      | -2.43      | -0.86      | -1.18      | -1.05      | -4.86      | -2.51      | -3.97      | -1.84      | -1.73      | -1.81      | -1.76      | -2.09      | -5.40      | -2.15      | -1.86      | -2.20      |
| SAR2-19                                               | -4.91      | -2.47      | -0.40      | -3.15      | -1.00      | -4.80      | -1.78      | -4.26      | -1.88      | -1.86      | -1.88      | -1.71      | -1.91      | -5.67      | -2.54      | -1.75      | -2.21      |
| SAR2-20                                               | -6.10      | -2.26      | -0.53      | -1.66      | -1.01      | -5.23      | -1.60      | -3.72      | -2.05      | -1.54      | -1.73      | -1.59      | -1.80      | -4.36      | -2.31      | -1.50      | -1.99      |
| SAR2-21                                               | -6.27      | -2.26      | -0.74      | -1.96      | -1.01      | -5.01      | -1.71      | -3.48      | -1.92      | -1.47      | -1.72      | -1.56      | -1.40      | -4.17      | -2.11      | -1.52      | -1.94      |
| SAR2-22                                               | -5.84      | -2.31      | -0.30      | -1.42      | -0.99      | -5.17      | -1.13      | -3.75      | -2.00      | -1.69      | -1.76      | -1.52      | -1.79      | -4.44      | -2.57      | -1.54      | -2.06      |
| SAR2-23                                               | -6.48      | -2.21      | -0.08      | -0.85      | -1.00      | -4.63      | -1.12      | -3.95      | -2.07      | -1.82      | -1.87      | -1.61      | -2.64      | -4.57      | -3.03      | -1.56      | -2.10      |
| SAR2-24                                               | -4.45      | -2.61      | -0.10      | -0.91      | -1.22      | -4.61      | -0.78      | -4.54      | -2.13      | -1.93      | -1.69      | -1.96      | -3.01      | -5.36      | -2.65      | -1.54      | -1.56      |
| SAR2-25                                               | -6.06      | -2.53      | -0.08      | -1.44      | -1.07      | -4.58      | -1.38      | -4.04      | -1.83      | -1.97      | -1.88      | -1.48      | -1.83      | -4.68      | -3.23      | -1.74      | -2.23      |
| SAR2-26                                               | -6.02      | -2.50      | -0.09      | -1.34      | -1.06      | -4.38      | -1.31      | -4.17      | -1.92      | -2.16      | -1.94      | -1.61      | -2.30      | -4.66      | -3.01      | -1.56      | -2.21      |
| SAR2-27                                               | -5.54      | -2.25      | -0.45      | -1.55      | -1.05      | -5.04      | -1.42      | -3.79      | -2.17      | -1.57      | -1.86      | -1.81      | -2.13      | -4.71      | -2.22      | -1.52      | -1.97      |
| SAR2-28                                               | -5.03      | -2.82      | -0.10      | -1.41      | -1.18      | -4.82      | -1.23      | -4.38      | -2.22      | -1.76      | -1.94      | -2.05      | -2.93      | -4.56      | -2.85      | -1.68      | -1.79      |
| SAR2-29                                               | -6.08      | -2.09      | -0.07      | -1.24      | -0.96      | -4.31      | -1.82      | -3.69      | -2.32      | -1.78      | -1.75      | -1.47      | -1.90      | -4.35      | -3.89      | -1.25      | -1.99      |
| SAR2-30                                               | -5.58      | -2.77      | -0.09      | -1.49      | -1.16      | -4.68      | -0.88      | -4.31      | -2.23      | -1.70      | -1.91      | -2.02      | -2.91      | -4.46      | -2.69      | -1.69      | -1.86      |
| SAR2-31                                               | -6.08      | -2.40      | -0.65      | -0.85      | -1.07      | -4.24      | -2.29      | -4.34      | -2.23      | -1.86      | -1.82      | -1.98      | -1.61      | -4.43      | -2.23      | -1.43      | -1.98      |
| SAR2-32                                               | -6.35      | -2.52      | -0.06      | -1.23      | -1.01      | -4.52      | -1.08      | -4.05      | -1.93      | -1.84      | -1.82      | -1.56      | -2.18      | -4.61      | -2.80      | -1.60      | -2.15      |

|                                                                                             |       |       |       |       |       |       |       |       |       |       |       |       |       |       |       |       |       |
|---------------------------------------------------------------------------------------------|-------|-------|-------|-------|-------|-------|-------|-------|-------|-------|-------|-------|-------|-------|-------|-------|-------|
| SAR2-33                                                                                     | -6.36 | -2.56 | -0.07 | -1.19 | -1.02 | -4.59 | -1.15 | -4.02 | -1.93 | -1.85 | -1.83 | -1.56 | -2.39 | -4.62 | -2.67 | -1.61 | -2.09 |
| SAR2-34                                                                                     | -6.25 | -2.62 | -0.07 | -1.10 | -1.02 | -4.58 | -1.25 | -3.89 | -1.86 | -1.91 | -1.84 | -1.51 | -2.40 | -4.50 | -2.79 | -1.64 | -2.13 |
| SAR2-35                                                                                     | -6.31 | -2.63 | -0.08 | -1.32 | -0.98 | -4.52 | -1.35 | -3.94 | -1.99 | -1.79 | -1.79 | -1.47 | -2.29 | -4.29 | -2.79 | -1.49 | -2.11 |
| SAR2-36                                                                                     | -6.37 | -2.68 | -0.07 | -1.33 | -0.99 | -4.46 | -1.21 | -3.86 | -1.90 | -1.82 | -1.80 | -1.49 | -2.73 | -4.48 | -2.82 | -1.58 | -2.19 |
| SAR2-37                                                                                     | -4.71 | -2.24 | -1.20 | -2.08 | -1.08 | -5.34 | -1.47 | -4.11 | -1.94 | -1.74 | -1.87 | -1.77 | -1.88 | -5.28 | -2.63 | -1.85 | -2.09 |
| SAR2-38                                                                                     | -6.47 | -2.90 | -0.07 | -1.21 | -1.04 | -4.46 | -1.50 | -3.37 | -1.80 | -1.72 | -1.70 | -1.29 | -1.21 | -4.62 | -3.83 | -1.46 | -2.00 |
| SAR2-39                                                                                     | -6.30 | -2.64 | -0.07 | -1.41 | -0.98 | -4.35 | -1.53 | -3.41 | -1.96 | -1.66 | -1.84 | -1.40 | -1.32 | -4.59 | -3.83 | -1.31 | -1.90 |
| AVERAGE                                                                                     | -5.89 | -2.49 | -0.30 | -1.29 | -1.05 | -4.63 | -1.58 | -4.04 | -2.10 | -1.79 | -1.85 | -1.73 | -1.92 | -4.77 | -2.56 | -1.55 | -2.03 |
| STANDARD DEVIATION                                                                          | 0.68  | 0.22  | 0.32  | 0.50  | 0.09  | 0.30  | 0.49  | 0.33  | 0.21  | 0.18  | 0.07  | 0.23  | 0.55  | 0.49  | 0.56  | 0.17  | 0.19  |
| *Note: residue numbers correspond to corresponding sequence number in hCB1 without ICL3 ins |       |       |       |       |       |       |       |       |       |       |       |       |       |       |       |       |       |

## S2. Repeat dosing pharmacokinetic study of 25

In an effort to understand whether repeat dosing of **25** leads to accumulation of this compound in brain and other tissues, a 7-day repeat dosing PK study was performed. Female C57BL6 mice were procured from Jackson Laboratories at 8 weeks of age. Dose of **25** was formulated in 0.5% sodium carboxymethylcellulose with 1% NMP and 0.3% Tween 80 at 10 mg/kg. Animals were dosed twice daily by oral gavage at 1.25 mg/kg. On day 7, animals were given a final dose of **25** and three animals per group were sacrificed at various time-points. Adjusted concentrations of the parent compound between the single dose (SD) PK study reported in the main manuscript and repeat dose (RD) PK study were compared in **Table S2**. Pharmacokinetic analyses were performed as has been described in our previous publications using Phoenix WinNonlin (Certara). No significant differences were noted between the two studies indicating lack of brain accumulation of **25** upon repeat dosing for 7 days.

| Time post-dose (hr) | Plasma SD (ng/ml) | Plasma RD (ng/ml) | Brain SD (ng/g) | Brain RD (ng/g) |
|---------------------|-------------------|-------------------|-----------------|-----------------|
| 0.5                 | 507               | 371               | 17              | 18              |
| 1                   | 139               | 133               | 10              | 8               |
| 2                   | 34                | 24                | 7               | 4               |
| 4                   | 24                | 10                | 5               | 2               |
| 8                   | 23                | 6                 | 5               | 0               |
| 24                  | 2                 | 2                 | 2               | 0               |

## S3. Brain concentration of 25 after 2 weeks of dosing in alcoholic steatosis study

Concentration of **25** was measured from the brains of animals used in the alcohol efficacy study reported in the main manuscript. Approximately 16 hr after the last dose animals were sacrificed and their brains were collected and processed as described for PK studies. Quantification of **25** was performed using LC-MS. Brain concentration of **25** in 4 random animals was 0.42 ng/g  $\pm$  0.19 ng/g at sacrifice. Thus, 2-week exposure to **25** did not lead to increased accumulation of the compound in mouse brains.

## S4. Pharmacokinetic assessment of compound 1 (rimonabant)

Female C57BL6 mice were administered rimonabant by oral gavage at a concentration of 5 mg/kg essentially as described for other PK studies. Animals were sacrificed at various time-points and tissue samples were analyzed by LC-MS. Pharmacokinetic analyses were performed using Phoenix WinNonlin (Certara). Data indicate rimonabant has high brain exposure upon oral administration, a feature that is absent from **25**.

Figure S4. PK analyses of rimonabant

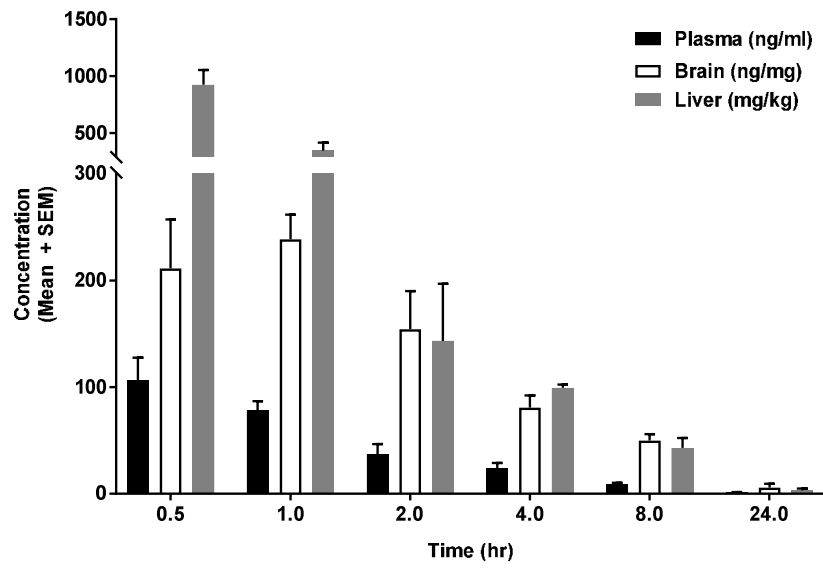

## S5. Compound strings

| #  | Smiles                                                                                        |
|----|-----------------------------------------------------------------------------------------------|
| 6  | <chem>C1C(C=C1)=CC=C1N2C3=NC=NC(N4CCN(C)CC4)=C3N=C2C5=CC=CC=C5C1</chem>                       |
| 7  | <chem>C1C(C=C1)=CC=C1N2C3=NC=NC(N4CCN(C5CCCC5)CC4)=C3N=C2C6=CC=CC=C6C1</chem>                 |
| 8  | <chem>C1C(C=C1)=CC=C1N2C3=NC=NC(N4CCN(C5=CC=CC=C5)CC4)=C3N=C2C6=CC=CC=C6C1</chem>             |
| 9  | <chem>C1C(C=C1)=CC=C1N2C3=NC=NC(N4CCN(C5=CC=CC=N5)CC4)=C3N=C2C6=CC=CC=C6C1</chem>             |
| 10 | <chem>C1C(C=C1)=CC=C1N2C3=NC=NC(N4CCN(C5=CC=NC=C5)CC4)=C3N=C2C6=CC=CC=C6C1</chem>             |
| 11 | <chem>C1C(C=C1)=CC=C1N2C3=NC=NC(N4CCN(C5=CC=CC=C5C#N)CC4)=C3N=C2C6=CC=CC=C6C1</chem>          |
| 12 | <chem>C1C(C=C1)=CC=C1N2C3=NC=NC(N4CCN(C5=CC=CC=C5OC)CC4)=C3N=C2C6=CC=CC=C6C1</chem>           |
| 13 | <chem>C1C(C=C1)=CC=C1N2C3=NC=NC(N4CCN(C5=CC=CC(OC)=C5)CC4)=C3N=C2C6=CC=CC=C6C1</chem>         |
| 14 | <chem>C1C(C=C1)=CC=C1N2C3=NC=NC(N4CCN(C5=CC=CC(O)=C5)CC4)=C3N=C2C6=CC=CC=C6C1</chem>          |
| 15 | <chem>C1C(C=C1)=CC=C1N2C3=NC=NC(N4CCN(C5=CC=C(F)C=C5)CC4)=C3N=C2C6=CC=CC=C6C1</chem>          |
| 16 | <chem>C1C(C=C1)=CC=C1N2C3=NC=NC(N4CCN(C5=CC=C(C#N)C=C5)CC4)=C3N=C2C6=CC=CC=C6C1</chem>        |
| 17 | <chem>C1C(C=C1)=CC=C1N2C3=NC=NC(N4CCN(C5=CC=C(OC)C=C5)CC4)=C3N=C2C6=CC=CC=C6C1</chem>         |
| 18 | <chem>C1C(C=C1)=CC=C1N2C3=NC=NC(N4CCN(C5=CC=C(O)C=C5)CC4)=C3N=C2C6=CC=CC=C6C1</chem>          |
| 19 | <chem>C1C(C=C1)=CC=C1N2C3=NC=NC(N4CCN(CC5=CC=CC=C5)CC4)=C3N=C2C6=CC=CC=C6C1</chem>            |
| 20 | <chem>C1C(C=C1)=CC=C1N2C3=NC=NC(N4CCN(C(C5=CC=CC=C5)C)CC4)=C3N=C2C6=CC=CC=C6C1</chem>         |
| 21 | <chem>C1C(C=C1)=CC=C1N2C3=NC=NC(N4CCN(C(C#N)C5=CC=CC=C5)CC4)=C3N=C2C6=CC=CC=C6C1</chem>       |
| 22 | <chem>C1C(C=C1)=CC=C1N2C3=NC=NC(N4CCN(CC5=CC=NC=C5)CC4)=C3N=C2C6=CC=CC=C6C1</chem>            |
| 23 | <chem>C1C(C=C1)=CC=C1N2C3=NC=NC(N4CCN(C(C)C5=CC=NC=C5)CC4)=C3N=C2C6=CC=CC=C6C1</chem>         |
| 24 | <chem>C1C(C=C1)=CC=C1N2C3=NC=NC(N4CCN(CC5=C(F)C=CC=C5)CC4)=C3N=C2C6=CC=CC=C6C1</chem>         |
| 25 | <chem>C1C(C=C1)=CC=C1N2C3=NC=NC(N4CCN(CC5=C(Cl)C=CC=C5)CC4)=C3N=C2C6=CC=CC=C6C1</chem>        |
| 26 | <chem>C1C(C=C1)=CC=C1N2C3=NC=NC(N4CCN(CC5=C(Cl)C=NC=C5)CC4)=C3N=C2C6=CC=CC=C6C1</chem>        |
| 27 | <chem>C1C(C=C1)=CC=C1N2C3=NC=NC(N4CCN(C(OC)=O)CC4)=C3N=C2C5=CC=CC=C5C1</chem>                 |
| 28 | <chem>C1C(C=C1)=CC=C1N2C3=NC=NC(N4CCN(CC5=C(C(F)(F)F)C=CC=C5)CC4)=C3N=C2C6=CC=CC=C6C1</chem>  |
| 29 | <chem>C1C(C=C1)=CC=C1N2C3=NC=NC(N4CCN(CC5=C(OC(F)(F)F)C=CC=C5)CC4)=C3N=C2C6=CC=CC=C6C1</chem> |
| 30 | <chem>C1C(C=C1)=CC=C1N2C3=NC=NC(N4CCN(CC5=CC=CC=C5C#N)CC4)=C3N=C2C6=CC=CC=C6C1</chem>         |
| 31 | <chem>C1C(C=C1)=CC=C1N2C3=NC=NC(N4CCN(CC5=CC=CC(Cl)=C5)CC4)=C3N=C2C6=CC=CC=C6C1</chem>        |
| 32 | <chem>C1C(C=C1)=CC=C1N2C3=NC=NC(N4CCN(CC5=CC=C(F)C=C5)CC4)=C3N=C2C6=CC=CC=C6C1</chem>         |
| 33 | <chem>C1C(C=C1)=CC=C1N2C3=NC=NC(N4CCN(CC5=CC=C(Cl)C=C5)CC4)=C3N=C2C6=CC=CC=C6C1</chem>        |
| 34 | <chem>C1C(C=C1)=CC=C1N2C3=NC=NC(N4CCN(CC5=CC=C(C)C=C5)CC4)=C3N=C2C6=CC=CC=C6C1</chem>         |
| 35 | <chem>C1C(C=C1)=CC=C1N2C3=NC=NC(N4CCN(CC5=CC=C(OC)C=C5)CC4)=C3N=C2C6=CC=CC=C6C1</chem>        |
| 36 | <chem>C1C(C=C1)=CC=C1N2C3=NC=NC(N4CCN(CC5=C(C)N(C)N=C5)CC4)=C3N=C2C6=CC=CC=C6C1</chem>        |
| 37 | <chem>C1C(C=C1)=CC=C1N2C3=NC=NC(N4CCN(CC5=NOC(O)=N5)CC4)=C3N=C2C6=CC=CC=C6C1</chem>           |
| 38 | <chem>C1C(C=C1)=CC=C1N2C3=NC=NC(N4CCN(CCC5=CC=CC=C5)CC4)=C3N=C2C6=CC=CC=C6C1</chem>           |
| 39 | <chem>C1C(C=C1)=CC=C1N2C3=NC=NC(N4CCN(CCC5=CC=NC=C5)CC4)=C3N=C2C6=CC=CC=C6C1</chem>           |
| 40 | <chem>C1C(C=C1)=CC=C1N2C3=NC=NC(N4CCN(C5=CC=CC=C5F)CC4)=C3N=C2C6=CC=CC=C6C1</chem>            |
| 41 | <chem>C1C(C=C1)=CC=C1N2C3=NC=NC(N4CCN(C5=CC=CC=C5Cl)CC4)=C3N=C2C6=CC=CC=C6C1</chem>           |
